# Supplementary material for: Phospho-ERK levels as predictors for chemotherapy of rectal carcinoma
Source: PubMed Central journal article supplement (PMC6422203; doi:10.18632/oncotarget.26741), 2019-03-01
Supplement: oncotarget-10-1745-s001.pdf [file oncotarget-10-1745-s001.pdf]

# Phospho-ERK levels as predictors for chemotherapy of rectal carcinoma

## SUPPLEMENTARY MATERIALS

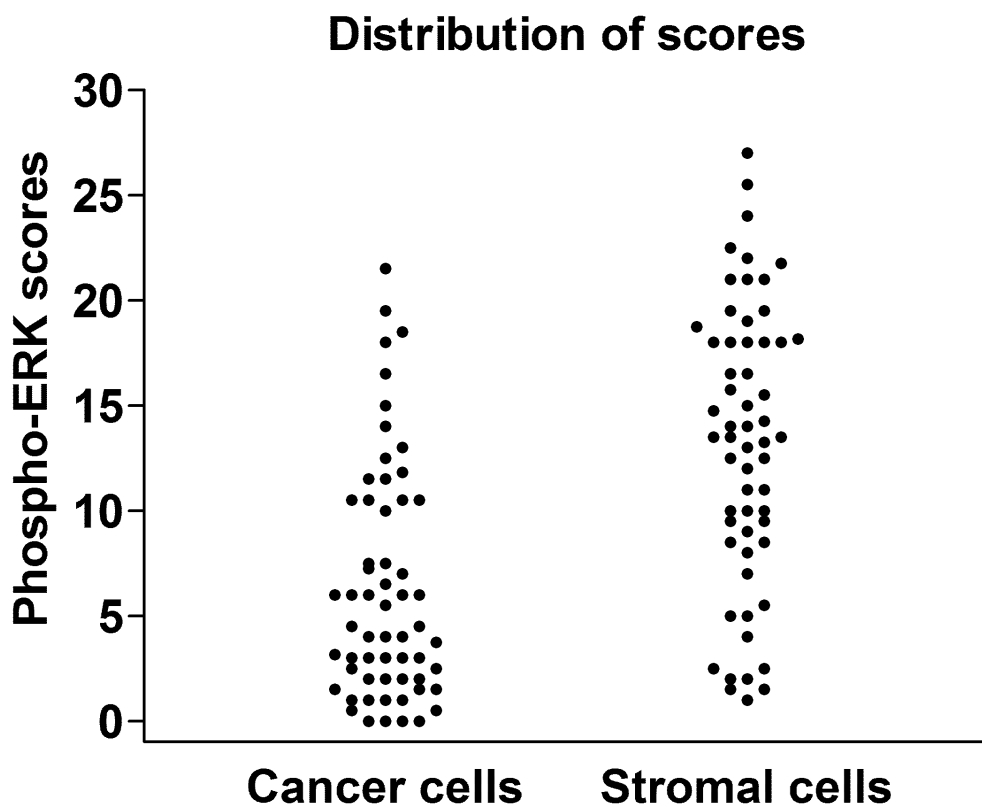

Supplementary Figure 1: Scattergram illustrating the distribution of scores for nuclei in cancer cells and stromal cells.
